# Supplementary material for: MicroRNA expression and its association with DNA repair in preimplantation embryos
Source: PubMed Central journal article supplement — J Reprod Dev. 2016 Feb 5;62(3):225–34. doi: 10.1262/jrd.2015-167 (PMC4919285; doi:10.1262/jrd.2015-167), 2016-02-05
Supplement: jrd-62-225-s001.pdf [file jrd-62-225-s001.pdf]

## Supplementary tables

miRNAs expressed in gametes and preimplantation embryos in mouse, human and bovine and list of their target genes including repair pathways they are associated with are shown in this table. The expression of miRNA in gametes and preimplantation embryo development is represented by “✓”. If the expression level of miRNA compared to the previous stage of the development is increased (i.e. increased level at the 4-cell stage than the 2-cell stage), this increased expression level is represented by “↑”. If the expression level of miRNA compared to the previous stage of the development is decreased, this reduced expression level is represented by ↓. If there has not been any studies analysing the expression of a miRNA at that particular stage of preimplantation embryo development, this was shown as blank. The reference for miRNAs and target genes have been cited within the table of the miRNA and mRNA target columns [1-8] and in cases where there has not been any study, the predicted targets of miRNAs have been obtained using databases (<http://www.microrna.org/microrna/home.do>, <http://www.targetscan.org/>, <http://mirdb.org/miRDB/>).

- a) Expression profiles of miRNAs in gametes and embryos and their target base excision repair genes.

| miRNA    | Target repair mRNA                                      | Species | Oocyte | Sperm | Zygote | 2-cell | 4-cell | 8-cell | Morula | Blastocyst |
|----------|---------------------------------------------------------|---------|--------|-------|--------|--------|--------|--------|--------|------------|
| miR-22   | <i>UNG,MDC1</i>                                         | Mouse   |        |       | ✓      | ↑      | ↑      | ↑      |        |            |
| miR-96   | <i>MBD4</i>                                             | Mouse   |        |       | ✓      | ↓      | ↑      | ↑      |        |            |
| miR-98   | <i>ERCC6, DCLRE1B, RAD9A</i>                            | Mouse   |        |       | ✓      | ↓      | ↓      | ↓      |        |            |
|          |                                                         | Bovine  | ✓      |       |        |        |        |        |        |            |
| miR-101a | <i>TDG, FANCM, POLH,REV3L, UBE2A</i>                    | Mouse   |        |       | ✓      | ↓      | ↑      | ↑      |        |            |
| miR-101b | <i>TDG, NEIL1, FANCM,POLH, REV3L</i>                    | Mouse   |        |       | ✓      | ↓      | ↑      | ↑      |        |            |
| miR-103  | <i>NEIL1, TDG -103-<math>\alpha</math>,POLH- 103-as</i> | Mouse   | ✓      | ✓     | ✓      | ↓      | ↑      | ↑      | ↑      |            |
| miR-107  | <i>TDG, NEIL1</i>                                       | Mouse   | ✓      | ✓     | ✓      | ↓      | ↑      | ↓      |        |            |
|          |                                                         | Bovine  | ✓      |       |        |        |        |        |        |            |
| miR-204  | <i>UNG- 5p,POLH, POLK</i>                               | Mouse   |        |       | ✓      | ↓      | ↓      | ↑      | ↑      | ↑          |
| miR-211  | <i>UNG,POLH, POLK</i>                                   | Mouse   |        |       | ✓      | ↓      | ↑      | ↓      | ↑      | ↓          |
| miR-223  | <i>PARP1</i>                                            | Mouse   | ✓      | ✓     | ✓      | ↓      | ↑      | ↓      |        |            |
|          |                                                         | Bovine  | ✓      |       |        |        |        |        |        |            |
| miR-296  | <i>MBD4</i>                                             | Mouse   |        |       | ✓      | ↓      | ↑      | ↑      |        |            |
| miR-298  | <i>OGG1</i>                                             |         |        |       |        |        |        |        |        |            |
|          | <i>TDP1</i>                                             | Mouse   | ✓      | ✓     | ✓      | ↑      | ↓      | ↑      |        |            |

b) Expression profiles of miRNAs in gametes and embryos and their target nucleotide excision repair genes.

| miRNA       | Target repair mRNA                                       | Species | Oocyte | Sperm | Zygote | 2-cell | 4-cell | 8-cell | Morula | Blastocyst |
|-------------|----------------------------------------------------------|---------|--------|-------|--------|--------|--------|--------|--------|------------|
| miR-10a     | <i>GTF2H1</i>                                            | Mouse   | ✓      | ✓     | ✓      | ↓      | ↓      | ↓      |        |            |
|             |                                                          | Bovine  | ✓      |       |        |        |        |        |        |            |
| miR-10b     | <i>GTF2H1</i>                                            | Mouse   | ✓      | ✓     | ✓      | ↑      | ↑      | ↑      |        |            |
|             |                                                          | Bovine  | ✓      |       |        |        |        |        |        |            |
| miR-15b     | <i>ERCC6, RAD23B, DDB2 (LHX3), CHEK1</i>                 | Mouse   | ✓      | ✓     |        |        | ✓      | ✓      | ↑      | ↑          |
|             |                                                          | Bovine  | ✓      |       |        |        |        |        |        |            |
| miR-16      | <i>RAD23B, CHEK1, Wip1</i>                               | Mouse   | ✓      | ✓     | ✓      | ↓      | ↓      | ↓      |        |            |
|             |                                                          | Bovine  | ✓      |       |        |        |        |        |        |            |
|             |                                                          | Human   | ✓      |       |        |        |        |        |        |            |
| miR-20b     | <i>RPA2b, CHAF1A, UBE2, FANCD2, POLQ, POLH</i>           | Bovine  | ✓      |       |        |        |        |        |        |            |
| miR-23a     | <i>CCNH, RAD23B, RAD1, DCLRE1A, UBE2V2, POLH, FANCD2</i> | Mouse   | ✓      | ✓     | ✓      | ↓      | ↓      | ↓      |        |            |
| miR-23b     | <i>CCNH, RAD23B, H2AX, RAD1, DCLRE1A, POLH, FANCD1</i>   | Mouse   | ✓      | ✓     | ✓      | ↓      | ↓      | ↓      |        |            |
|             |                                                          | Bovine  | ✓      |       |        |        |        |        |        |            |
| miR-130a    | <i>ERCC4, GTF2H1, FANCA</i>                              | Mouse   |        |       | ✓      | ↓      | ↑      | ↑      |        |            |
|             |                                                          | Bovine  | ✓      |       |        |        |        |        |        |            |
| miR-134     | <i>ERCC6, RAD18</i>                                      | Mouse   | ✓      | ✓     | ✓      | ✓      | ↑      | ↑      |        |            |
| miR-144     | <i>GTF2H2</i>                                            | Mouse   |        |       | ✓      | ✓      | ✓      | ✓      |        |            |
| miR-152     | <i>GTF2H1</i>                                            | Mouse   |        |       | ✓      | ↑      | ↓      | ↑      |        |            |
| miR-181c    | <i>RAD23B, POLI, POLQ, ATM, FANCM</i>                    | Mouse   |        |       | ✓      | ↓      | ↑      | ↑      |        |            |
|             |                                                          | Bovine  | ✓      |       |        |        |        |        |        |            |
| miR-192 [9] | <i>ERCC3, ERCC4</i>                                      | Mouse   |        |       | ✓      | ↑      | ↓      | ✓      |        |            |
|             |                                                          | Bovine  | ✓      |       |        |        |        |        |        |            |
|             |                                                          | Human   |        |       |        |        |        |        |        | ✓          |
| miR-199a-5p | <i>RAD23B</i>                                            | Mouse   |        |       | ✓      | ↑      | ↑      | ↓      |        |            |
|             |                                                          | Bovine  | ✓      |       |        |        |        |        |        |            |
| miR-199b-5p | <i>RAD23B</i>                                            | Mouse   |        |       | ✓      | ↓      | ↑      | ↓      |        |            |
| miR-215     | <i>ERCC4 (XPF)</i>                                       | Mouse   |        |       | ✓      | ✓      | ✓      | ✓      |        |            |

|            |                                                           |        |   |   |   |   |   |   |  |   |
|------------|-----------------------------------------------------------|--------|---|---|---|---|---|---|--|---|
| miR-218    | <i>CETN2,RAD1</i>                                         | Mouse  |   |   | ✓ | ↓ | ↑ | ↓ |  |   |
| miR-221    | <i>ERCC4 (XPF),RRM2B, FANCD2</i>                          | Mouse  | ✓ | ✓ | ✓ | ↓ | ↑ | ↓ |  |   |
| miR-222    | <i>ERCC4 (XPF),RRM2B, FANCD2</i>                          | Mouse  | ✓ | ✓ | ✓ | ↓ | ↓ | ↓ |  |   |
| miR-323    | <i>DDB1</i>                                               | Mouse  |   |   | ✓ | ↑ | ↓ | ↑ |  |   |
| miR-324-3p | <i>RPA1</i>                                               | Mouse  |   |   |   | ↓ | ↑ | ↑ |  |   |
| miR-345    | <i>RPA1</i>                                               | Mouse  |   |   | ✓ |   |   |   |  |   |
| miR-33     | <i>ERCC4(XPF)-33a, ERCC6</i>                              | Mouse  |   |   | ✓ | ✓ | ✓ | ✓ |  |   |
| miR-342    | <i>MMS19L (MMS19) - 3P</i>                                | Mouse  | ✓ | ✓ | ✓ | ↓ | ↓ | ↑ |  |   |
|            |                                                           | Bovine | ✓ |   |   |   |   |   |  |   |
| miR-345    | <i>RPA1</i>                                               | Mouse  |   |   | ✓ | ↑ | ↑ | ↓ |  |   |
| miR-372    | <i>ERCC4 (XPF), POLK,RAD18, UBE2B</i>                     | Human  |   |   |   |   |   |   |  | ✓ |
|            |                                                           | Bovine | ✓ |   |   |   |   |   |  |   |
| miR-373    | <i>ERCC4, POLK,UBE2B, RAD18, RAD23B[10] and RAD52[10]</i> | Bovine | ✓ |   |   |   |   |   |  |   |
|            |                                                           | Human  |   |   |   |   |   |   |  | ✓ |
| miR-381    | <i>GTF2H1,TP53</i>                                        | Mouse  |   |   | ✓ | ↑ | ↓ | ↓ |  |   |
|            |                                                           | Bovine | ✓ |   |   |   |   |   |  |   |
| miR-423    | <i>DDB2 (LHX3)-423-5p</i>                                 | Bovine | ✓ |   |   |   |   |   |  |   |
| miR-424    | <i>ERCC6, RAD23B, DDB2(LHX3)</i>                          | Mouse  |   |   |   |   | ↓ |   |  |   |
|            |                                                           | Bovine | ✓ |   |   |   |   |   |  |   |
| miR-450    | <i>ERCC4 (XPF), GTF2H1- b-5b,UBE2A-b-5p, POLQ- b-3p</i>   | Mouse  |   |   | ✓ | ↑ | ↑ | ↑ |  |   |
| miR-454    | <i>GTF2H1, ERCC4,FANCA</i>                                | Human  |   |   |   |   |   |   |  | ✓ |
| miR-483    | <i>GTF2H1</i>                                             | Bovine | ✓ |   |   |   |   |   |  |   |
| miR-512-3p | <i>ERCC4,POLK</i>                                         | Human  |   |   |   |   |   |   |  | ✓ |
| miR-888    | <i>GTF2H2,TDP1</i>                                        | Human  | ✓ |   |   |   |   |   |  |   |
| miR-1260   | <i>DDB1,RAD18, FANCC</i>                                  | Bovine | ✓ |   |   |   |   |   |  |   |

c) Expression profiles of miRNAs in gametes and embryos and their target double strand break repair genes

(<http://www.microrna.org/microrna/home.do>,<http://www.targetscan.org/>,<http://mirdb.org/miRDB/>).

| miRNA        | Target repair mRNA                  | Species        | Oocyte | Sperm | Zygote | 2-cell | 4-cell | 8-cell | Morula | Blastocyst |
|--------------|-------------------------------------|----------------|--------|-------|--------|--------|--------|--------|--------|------------|
| miR-1        | <i>BRCA1, TDP1</i>                  | Mouse          |        |       | ✓      | ↓      | ↑      | ↓      |        |            |
| miR-9        | <i>MRE11A, PRKDC, POLE, POLI</i>    | Mouse          |        |       | ✓      | ↓      | ↓      | ↑      |        |            |
| miR-18       | <i>RBBP8, DCLRE1C, ATM</i>          | Mouse          |        | ✓     | ✓      | ↓      | ↑      | ↑      |        |            |
| miR-24       | <i>H2AX [11], H2AFX</i>             | Mouse<br>Human | ✓<br>✓ | ✓     | ✓      | ↓      | ↓      | ↓      |        | ↓          |
| miR-34a      | <i>EME1</i>                         | Mouse          |        |       |        | ↑      | ↑      | ↑      | ↑      |            |
| miR-34b      | <i>XRCC2<br/>FANCF</i>              | Mouse          |        |       | ✓      | ✓      | ↑      | ↑      | ↓      |            |
|              |                                     | Human          | ✓      |       |        |        |        |        |        | ✓          |
| miR-34c      | <i>EME1- 5p</i>                     | Mouse          | ✓      | ✓     | ✓      | ✓      | ↑      | ↑      |        |            |
|              |                                     | Bovine         | ✓      |       |        |        |        |        |        |            |
| miR-99a      | <i>RAD51 and<br/>BRCA1 [12, 13]</i> | Mouse          | ✓      | ✓     | ✓      | ✓      | ✓      | ↑      |        |            |
|              |                                     | Bovine         | ✓      |       |        |        |        |        |        |            |
| miR-99b      |                                     | ?              | ✓      | ✓     | ↑      | ↑      | ↑      |        |        |            |
| miR-125a     | <i>BRCA1- 3p<br/>MDC1- 5p</i>       | Mouse          | ✓      | ✓     | ✓      | ↑      | ↑      | ↑      | ↑      | ↑          |
|              |                                     | Bovine         | ✓      |       |        | ↑      | ↓      | ↑      | ↓      | ↓          |
| miR-128a     | <i>RAD52<br/>UBE2N</i>              | Mouse          |        |       | ✓      | ✓      | ✓      | ↑      |        |            |
|              |                                     | Bovine         | ✓      |       |        |        |        |        |        |            |
| miR-128b     | <i>RAD52<br/>UBE2N</i>              | Mouse          |        |       | ✓      | ✓      | ✓      | ↑      |        |            |
|              |                                     | Bovine         | ✓      |       |        |        |        |        |        |            |
| miR-138 [14] | <i>H2AX</i>                         | Mouse          |        |       | ✓      | ↑      | ↓      | ↓      |        |            |
|              |                                     | Bovine         | ✓      |       |        |        |        |        |        |            |
| miR-139      | <i>EME1- 5p</i>                     | Mouse          |        |       | ✓      | ↓      | ↑      | ↓      |        |            |
| miR-140      | <i>Artemis</i>                      | Mouse          | ✓      | ✓     | ✓      | ↑      | ↑      | ↑      | ↓      | ↓          |
|              |                                     | Bovine         | ✓      |       |        |        |        |        |        |            |
| miR-143      | <i>EME1- 3p</i>                     | Bovine         | ✓      |       |        |        |        |        |        |            |
|              | <i>POLH</i>                         |                |        |       |        |        |        |        |        |            |
| miR-148a     | <i>GTF2H1</i>                       | Mouse          |        |       | ✓      | ↑      | ↓      | ↑      |        |            |
|              |                                     | Bovine         | ✓      |       |        |        |        |        |        |            |
| miR-148b     | <i>GTF2H1</i>                       | Mouse          |        |       | ✓      | ↑      | ↓      | ↑      |        |            |
| miR-         | <i>PRKDC,POLH</i>                   | Mouse          |        |       | ✓      | ↓      | ↑      | ↓      |        |            |

|             |                                     |        |         |  |   |   |   |   |   |      |
|-------------|-------------------------------------|--------|---------|--|---|---|---|---|---|------|
| 150         |                                     |        |         |  |   |   |   |   |   |      |
| miR-151     | <i>LIG4- 3p</i>                     | Mouse  |         |  | ✓ | ↓ | ↑ | ↓ |   |      |
|             | <i>FANCA- 5p</i>                    | Human  |         |  |   |   |   |   |   | ✓    |
| miR-153     | <i>BRCA1</i>                        | Mouse  |         |  | ✓ | ✓ | ✓ | ✓ |   |      |
|             |                                     | Bovine | ✓       |  |   |   |   |   |   |      |
| miR-154     | <i>MRE11,PCNA,UBE2A,TDP1,LIG4</i>   | Mouse  |         |  | ✓ | ✓ | ✓ | ✓ |   |      |
| miR-190     | <i>BRCA1<br/>POLI</i>               | Mouse  |         |  | ✓ | ↓ | ↓ | ✓ |   |      |
|             |                                     | Bovine | ✓       |  |   |   |   |   |   |      |
| miR-193     | <i>RAD51L1- 193a</i>                | Mouse  |         |  | ✓ | ↓ | ↑ | ↑ | ↓ |      |
|             | <i>DCLRE1C(193a-5p)</i>             | Human  | ✓(a-5p) |  |   |   |   |   |   | ✓(b) |
| miR-198     | <i>RAD51</i>                        | Bovine | ✓       |  |   |   |   |   |   |      |
|             | <i>FANCL</i>                        |        |         |  |   |   |   |   |   |      |
| miR-203     | <i>DCLRE1B,RAD18,RAF51,ATM,POLI</i> | Mouse  |         |  | ✓ | ↓ | ↑ | ↑ |   |      |
| miR-224     | <i>BRCA1, RAD51L1,TDP</i>           | Mouse  |         |  | ✓ | ↑ | ↑ | ↓ |   |      |
| miR-299     | <i>DMC1- 3p</i>                     | Mouse  |         |  |   | ↑ | ↑ | ↑ |   |      |
| miR-363     | <i>RAD21</i>                        | Bovine | ✓       |  |   |   |   |   |   |      |
|             | <i>REV3L, POLK</i>                  |        |         |  |   |   |   |   |   |      |
| miR-377     | <i>LIG4</i>                         | Mouse  |         |  | ✓ | ✓ | ✓ | ✓ |   |      |
| miR-383     | <i>Artemis,UBE2N,ATR,EXO1</i>       | Mouse  |         |  | ✓ | ↓ | ✓ | ✓ |   |      |
|             |                                     | Bovine | ✓       |  |   |   |   |   |   |      |
| miR-384     | <i>MRE11A</i>                       | Mouse  |         |  | ✓ | ✓ | ✓ | ✓ |   |      |
|             | <i>FANCM</i>                        | Bovine | ✓       |  |   |   |   |   |   |      |
| miR-412     | <i>RAD51L1</i>                      | Mouse  |         |  | ✓ | ✓ | ✓ | ✓ |   |      |
|             |                                     | Bovine | ✓       |  |   |   |   |   |   |      |
| miR-449     | <i>EME1-449a</i>                    | Mouse  |         |  | ✓ | ↑ | ↓ | ✓ |   |      |
| miR-625     | <i>NBN (NBS1)</i>                   | Human  | ✓       |  |   |   |   |   |   |      |
| miR-765     | <i>RAD52B</i>                       | Bovine | ✓       |  |   |   |   |   |   |      |
| miR-1224-5p | <i>RAD50</i>                        | Bovine | ✓       |  |   |   |   |   |   |      |

d) Expression profiles of miRNAs in gametes and embryos and their target mismatch repair genes (<http://www.microrna.org/microrna/home.do>, <http://www.targetscan.org/>, <http://mirdb.org/miRDB/>).

| miRNA      | Target repair mRNA                                                                 | Species | Oocyte | Sperm | Zygote | 2-cell | 4-cell | 8-cell | Morula | Blastocyst |
|------------|------------------------------------------------------------------------------------|---------|--------|-------|--------|--------|--------|--------|--------|------------|
| miR-26a    | <i>POLH, ATM, FANCD2, MSH3 (5p)</i>                                                | Mouse   | ✓      | ✓     | ✓      | ↓      | ↑      | ↓      |        |            |
|            |                                                                                    | Bovine  | ✓      |       |        |        |        |        |        |            |
| miR-26b    | <i>MSH3-5p, POLH, ATM, FANCD2</i>                                                  | Mouse   |        |       | ✓      | ↓      | ↑      | ↓      |        |            |
| miR-149    | <i>MLH3</i>                                                                        | Mouse   |        |       | ✓      | ↑      | ↓      | ↑      |        |            |
|            |                                                                                    | Bovine  | ✓      |       |        |        |        |        |        |            |
| miR-155    | <i>MSH2 [15, 16], MSH6 [15, 16], MLH1 [15, 16], FANCD2, FANCF, CHAF1A, DCLRE1A</i> | Mouse   |        |       | ✓      | ↓      | ↑      | ↓      |        |            |
|            |                                                                                    | Bovine  | ✓      |       |        |        |        |        |        |            |
| miR-219    | <i>MLH3- hsa-miR-219-2-3p, UBE2N - 5p, DUT- 1-3p</i>                               | Mouse   |        |       | ✓      | ↓      | ↓      | ↓      |        |            |
| miR-291-3p | <i>MSH2</i>                                                                        | Mouse   |        |       | ✓      | ↑      | ↑      | ↑      |        |            |
| miR-340    | <i>MLH3, NBN (NBS1), RAD50, Artemis, RRM2B, POLI, REV3L, HEL308</i>                | Mouse   |        |       | ✓      | ↓      | ↓      | ↓      |        |            |
| miR-370    | <i>MLH3</i>                                                                        | Mouse   |        |       | ✓      | ↑      | ↓      | ↓      |        |            |

e) Expression profiles of miRNAs in gametes and embryos and their target double strand break repair and nucleotide excision repair genes.

| miRNA   | DNA repair pathways                                    | Target repair mRNA                      | Species             | Oocyte | Sperm | Zygote | 2-cell | 4-cell | 8-cell | Morula | Blastocyst |
|---------|--------------------------------------------------------|-----------------------------------------|---------------------|--------|-------|--------|--------|--------|--------|--------|------------|
| miR-146 | NER                                                    | <i>RAD23B- b-3p</i>                     | Mouse               |        |       |        |        |        |        |        |            |
|         | DSBR (HR)                                              | <i>BRCA1, BRCA2- a and b-5p</i> [17]    |                     |        |       | ✓      | ↓      | ↓      | ↑      |        |            |
|         | Suspected DNA repair function                          | <i>RECQL5 a and b-5p</i>                | Human (miR-146b-5p) |        |       |        |        |        |        |        | ✓          |
| miR-183 | NER                                                    | <i>GTF2H1</i>                           | Mouse               |        |       |        |        |        |        |        |            |
|         | DSBR (HR)                                              | <i>RAD50</i>                            |                     |        |       | ✓      | ↓      | ↑      | ↑      |        |            |
|         | Suspected DNA repair function                          | <i>NEIL3</i>                            |                     |        |       |        |        |        |        |        |            |
| miR-185 | DSBR (HR)                                              | <i>NBN (NBS1)</i>                       |                     |        |       |        |        |        |        |        |            |
|         | NER                                                    | <i>ERCC6 (CSB)</i>                      | Mouse               |        |       | ✓      | ↓      | ↓      | ↑      |        |            |
| miR-188 | NER                                                    | <i>RAD23B- 188-3p</i>                   | Mouse               | ✓      | ✓     | ✓      | ↓      | ↑      | ↓      |        |            |
|         | DSBR (NHEJ)                                            | <i>XRCC5- 5p</i>                        |                     |        |       |        |        |        |        |        |            |
|         | DNA polymerases                                        | <i>POLH</i>                             | Bovine              | ✓      |       |        |        |        |        |        |            |
|         | Damage response                                        | <i>MDC1- 188-5p</i>                     |                     |        |       |        |        |        |        |        |            |
| miR-195 | NER                                                    | <i>ERCC6 (CSB), RAD23B, DDB2 (LHX3)</i> | Mouse               |        |       |        |        |        |        |        |            |
|         | DSBR (HR)                                              | <i>RAD50</i>                            |                     |        |       | ✓      | ↓      | ↑      | ↓      |        |            |
|         | Cell cycle checkpoint control                          | <i>Wee1</i>                             |                     |        |       |        |        |        |        |        |            |
| miR-301 | NER                                                    | <i>GTF2H1(a, b), ERCC4 (XPF)</i>        | Human               |        |       |        |        |        |        |        |            |
|         | DSBR (HR)                                              | <i>RAD51L1-301a and b</i>               |                     |        |       | ✓      | ↓      | ↑      | ↑      |        |            |
|         | Genes defective and sensitivity to DNA damaging agents | <i>ERCC4, FANCA- a&amp;b</i>            |                     |        |       |        |        |        |        |        |            |
| miR-328 | NER                                                    | <i>DDB2 (LHX3)</i>                      | Mouse               |        |       |        |        |        |        |        |            |
|         | DSBR (HR)                                              | <i>RAD51L1</i>                          |                     |        |       | ✓      | ↓      | ↓      | ↓      |        |            |
| miR-338 | NER                                                    | <i>ERCC6- 5P, GTF2H1- 3P</i>            | Mouse               |        |       | ✓      | ✓      | ↑      | ↑      |        |            |





- f) Expression profiles of miRNAs in gametes and embryos and their target nucleotide excision repair and base excision repair genes.

| miRNA      | DNA repair pathways                                    | Target repair mRNA    | Species | Oocyte | Sperm | Zygote | 2-cell | 4-cell | 8-cell | Morula | Blastocyst |
|------------|--------------------------------------------------------|-----------------------|---------|--------|-------|--------|--------|--------|--------|--------|------------|
| miR-30a-3p | NER                                                    | <i>GTF2H1, RAD23B</i> | Mouse   |        |       | ✓      | ↓      | ↓      | ↑      |        |            |
|            | BER                                                    | <i>NEIL2</i>          |         |        |       |        |        |        |        |        |            |
|            | RAD6 pathway                                           | <i>UBE2V2</i>         | Human   | ✓      |       |        |        |        |        |        |            |
| miR-30a-5p | NER                                                    | <i>GTF2H1, RAD23B</i> | Mouse   |        |       | ✓      | ↓      | ↓      | ↓      |        |            |
|            | BER                                                    | <i>NEIL2</i>          | Human   | ✓      |       |        |        |        |        |        |            |
|            | RAD6 pathway                                           | <i>UBE2V2</i>         | Bovine  | ✓      |       |        |        |        |        |        |            |
| miR-30b    | NER                                                    | <i>GTF2H1, RAD23B</i> | Mouse   | ✓      | ✓     | ✓      | ↓      | ↓      | ↓      |        |            |
|            | BER                                                    | <i>NEIL2</i>          | Bovine  | ✓      |       |        |        |        |        |        |            |
|            | RAD6 pathway                                           | <i>UBE2V2</i>         | Human   | ✓      |       |        |        |        |        |        |            |
| miR-30c    | NER                                                    | <i>GTF2H1, RAD23B</i> | Mouse   | ✓      | ✓     | ✓      | ↑      | ↑      | ↑      | ↑      |            |
|            | RAD6 pathway                                           | <i>UBE2V2</i>         | Bovine  | ✓      |       |        |        |        |        |        |            |
|            |                                                        |                       | Human   | ✓      |       |        |        |        |        |        | ✓          |
| miR-30d    | NER                                                    | <i>GTF2H1, RAD23B</i> | Mouse   | ✓      | ✓     | ✓      | ↓      | ↓      | ↓      |        |            |
|            | BER                                                    | <i>NEIL2</i>          | Bovine  | ✓      |       |        |        |        |        |        |            |
|            | RAD6 pathway                                           | <i>UBE2V2</i>         | Human   | ✓      |       |        |        |        |        |        |            |
| miR-30e    | NER                                                    | <i>GTF2H1, RAD23B</i> | Mouse   |        |       | ✓      | ↓      | ↑      | ↓      |        |            |
|            | BER                                                    | <i>NEIL2</i>          |         |        |       |        |        |        |        |        |            |
|            | RAD6 pathway                                           | <i>UBE2V2</i>         | Human   | ✓      |       |        |        |        |        |        |            |
| miR-130b   | NER                                                    | <i>ERCC4, GTF2H1</i>  | Mouse   |        |       | ✓      | ↑      | ↑      | ↑      |        |            |
|            | BER                                                    | <i>PARP1</i>          |         |        |       |        |        |        |        |        |            |
|            | Genes defective and sensitivity to DNA damaging agents | <i>FANCA</i>          | Bovine  | ✓      |       |        |        |        |        |        |            |
| miR-132    | NER                                                    | <i>GTF2H1</i>         | Mouse   |        |       | ✓      | ↑      | ↑      | ↑      |        |            |
|            | BER                                                    | <i>NEIL2</i>          |         |        |       |        |        |        |        |        |            |
| miR-141    | NER                                                    | <i>XPC</i>            | Mouse   |        |       | ✓      | ↓      | ↑      | ↓      |        |            |
|            | BER                                                    | <i>PARP2</i>          | Human   | ✓      |       |        |        |        |        |        |            |



|         |                               |                       |        |   |  |  |   |   |   |   |   |
|---------|-------------------------------|-----------------------|--------|---|--|--|---|---|---|---|---|
|         | Suspected DNA repair function | <i>DCLRE1B</i><br>-3P |        |   |  |  |   |   |   |   |   |
| miR-335 | BER                           | <i>PARP1</i>          | Mouse  |   |  |  |   |   |   |   |   |
|         | DSBR (HR)                     | <i>MRE11A</i>         |        |   |  |  |   |   |   |   |   |
|         | Suspected DNA repair function | <i>RECQL5</i>         |        |   |  |  | ↓ | ↑ | ↓ |   |   |
| miR-496 | DSBR (HR)                     | <i>RAD51L3</i>        | Bovine | ✓ |  |  | ↑ |   |   | ↑ | ↓ |
|         | BER                           | <i>PARP1</i>          | Human  |   |  |  |   |   |   |   |   |

h) Expression profiles of miRNAs in gametes and embryos and their target mismatch repair, double strand break repair and nucleotide excision repair genes.

| miRNA      | DNA repair pathways                                    | Target repair mRNA                              | Species | Oocyte | Sperm | Zygote | 2-cell | 4-cell | 8-cell | Morula | Blastocyst |
|------------|--------------------------------------------------------|-------------------------------------------------|---------|--------|-------|--------|--------|--------|--------|--------|------------|
| miR-21     | MMR                                                    | <i>MSH2</i> and <i>MSH6</i> [15, 16]            | Mouse   |        |       | ✓      | ↓      | ↑      | ↑      |        |            |
|            | DSBR (HR)                                              | <i>RAD51L3</i>                                  | Bovine  | ✓      |       |        |        |        |        |        |            |
|            | NER                                                    | <i>RPA2</i>                                     | Human   | ✓      |       |        |        |        |        |        | ✓          |
| miR-129-5p | MMR                                                    | <i>MLH3</i>                                     | Mouse   |        |       | ✓      | ↑      | ↑      | ↑      |        |            |
|            | DSBR (HR)                                              | <i>RAD51L1</i> , <i>XRCC2</i>                   |         |        |       |        |        |        |        |        |            |
|            | NER                                                    | <i>GTF2H1</i>                                   |         |        |       |        |        |        |        |        |            |
| miR-142-3p | MMR                                                    | <i>MLH3</i> , <i>MSH6</i>                       | Mouse   |        |       | ✓      | ✓      | ✓      | ✓      |        |            |
|            | NER                                                    | <i>CCNH</i>                                     |         |        |       |        |        |        |        |        |            |
|            | DSBR (HR)                                              | <i>NBN (NBS1)</i> , <i>RAD50</i> , <i>RBBP8</i> |         |        |       |        |        |        |        |        |            |
| miR-337    | NER                                                    | <i>GTF2H3-3P</i>                                | Mouse   |        |       | ✓      | ✓      | ↑      | ↑      |        |            |
|            | DSBR (NHEJ)                                            | <i>LIG4-3P</i>                                  |         |        |       |        |        |        |        |        |            |
|            | DSBR (HR)                                              | <i>NBN (NBS1)-3P</i>                            |         |        |       |        |        |        |        |        |            |
|            | MMR                                                    | <i>MSH3-5P</i>                                  |         |        |       |        |        |        |        |        |            |
| miR-380-3p | NER                                                    | <i>ERCC6</i>                                    | Mouse   |        |       |        | ✓      | ✓      | ✓      |        |            |
|            | MMR                                                    | <i>MSH4</i>                                     |         |        |       |        |        |        |        |        |            |
|            | DSBR (NHEJ)                                            | <i>XRCC4</i>                                    |         |        |       |        |        |        |        |        |            |
|            | RAD6 pathway                                           | <i>UBE2B</i>                                    |         |        |       |        |        |        |        |        |            |
|            | Suspected DNA repair function                          | <i>DCLRE1B</i>                                  |         |        |       |        |        |        |        |        |            |
|            | Genes defective and sensitivity to DNA damaging agents | <i>FANCF</i>                                    |         |        |       |        |        |        |        |        |            |
| miR-380-5p | MMR                                                    | <i>MSH4</i>                                     | Mouse   |        |       | ✓      | ✓      | ✓      | ✓      |        |            |
|            | NER                                                    | <i>ERCC6</i>                                    |         |        |       |        |        |        |        |        |            |
|            | DSBR (NHEJ)                                            | <i>XRCC4</i>                                    |         |        |       |        |        |        |        |        |            |
|            | RAD6 pathway                                           | <i>UBE2B</i>                                    |         |        |       |        |        |        |        |        |            |
|            | Suspected DNA repair function                          | <i>DCLRE1B</i>                                  |         |        |       |        |        |        |        |        |            |

|  |                                                        |              |        |   |  |  |  |  |  |  |  |  |
|--|--------------------------------------------------------|--------------|--------|---|--|--|--|--|--|--|--|--|
|  | Genes defective and sensitivity to DNA damaging agents | <i>FANCF</i> | Bovine | ✓ |  |  |  |  |  |  |  |  |
|--|--------------------------------------------------------|--------------|--------|---|--|--|--|--|--|--|--|--|

- i) Expression profiles of miRNAs in gametes and embryos and their target nucleotide excision repair, base excision repair and double strand break repair genes.

| miRNA    | DNA repair pathways                                    | Target repair mRNA         | Species | Oocyte | Sperm | Zygote | 2-cell | 4-cell | 8-cell | Morula | Blastocyst |
|----------|--------------------------------------------------------|----------------------------|---------|--------|-------|--------|--------|--------|--------|--------|------------|
| miR-29a  | NER                                                    | <i>ERCC6</i>               | Mouse   |        |       | ✓      | ↓      | ↓      | ↓      |        |            |
|          | BER                                                    | <i>TDG</i>                 |         |        |       |        |        |        |        |        |            |
|          | DSBR (HR)                                              | <i>MRE11A</i>              |         |        |       |        |        |        |        |        |            |
|          | Damage response genes                                  | <i>RAD1</i>                |         |        |       |        |        |        |        |        |            |
| miR-29b  | NER                                                    | <i>ERCC6</i>               | Mouse   |        |       | ✓      | ↓      | ↓      | ↓      |        |            |
|          | DSBR (HR)                                              | <i>MRE11A</i>              | Bovine  | ✓      |       | ✓      |        |        |        |        |            |
|          | BER                                                    | <i>TDG</i>                 |         |        |       |        |        |        |        |        |            |
|          | Damage response genes                                  | <i>RAD1</i>                |         |        |       |        |        |        |        |        |            |
| miR-29c  | NER                                                    | <i>ERCC6</i>               | Mouse   |        |       | ✓      | ↑      | ↑      | ↑      | ↑      |            |
|          | BER                                                    | <i>TDG</i>                 |         |        |       |        |        |        |        |        |            |
|          | DSBR (HR)                                              | <i>MRE11A</i>              |         |        |       |        |        |        |        |        |            |
|          | Damage response genes                                  | <i>RAD1</i>                |         |        |       |        |        |        |        |        |            |
| miR-124a | NER                                                    | <i>RAD23B</i>              | Mouse   | ✓      | ✓     | ✓      | ↑      | ↓      | ↑      |        |            |
|          | BER                                                    | <i>APEX2</i>               |         |        |       |        |        |        |        |        |            |
|          | DSBR (HR)                                              | <i>RAD51-124a and b</i>    |         |        |       |        |        |        |        |        |            |
|          | Damage response genes                                  | <i>RAD17</i>               | Bovine  | ✓      |       |        |        |        |        |        |            |
| miR-200a | NER                                                    | <i>XPC</i>                 | Mouse   |        |       | ✓      | ↓      | ↓      | ↓      |        |            |
|          | BER                                                    | <i>PARP2</i>               |         |        |       |        |        |        |        |        |            |
|          | DSBR (HR)                                              | <i>BRCA1</i>               |         |        |       |        |        |        |        |        |            |
|          | Suspected DNA repair function                          | <i>RECQL5, XPC</i>         |         |        |       |        |        |        |        |        |            |
|          | Genes defective and sensitivity to DNA damaging agents | <i>ATM</i>                 |         |        |       |        |        |        |        |        |            |
| miR-212  | DSBR (HR)                                              | <i>RAD50, BRCA1</i>        | Mouse   |        |       | ✓      | ✓      | ↑      | ↑      |        |            |
|          | NER                                                    | <i>GTF2H1</i>              | Human   | ✓      |       |        |        |        |        |        |            |
|          | BER                                                    | <i>NEIL2</i>               |         |        |       |        |        |        |        |        |            |
| miR-217  | NER                                                    | <i>ERCC6 (CSB), GTF2H2</i> | Mouse   |        |       | ✓      | ↑      | ↓      | ✓      |        |            |
|          | BER                                                    | <i>TDG</i>                 |         |        |       |        |        |        |        |        |            |
|          | DSBR (HR)                                              | <i>MRE11A</i>              |         |        |       |        |        |        |        |        |            |
|          | DNA polymerases                                        | <i>POLH,</i>               |         |        |       |        |        |        |        |        |            |

|         |                                                        |                  |       |  |  |   |   |   |   |  |  |
|---------|--------------------------------------------------------|------------------|-------|--|--|---|---|---|---|--|--|
|         |                                                        | <i>PCNA</i>      |       |  |  |   |   |   |   |  |  |
|         | Genes defective and sensitivity to DNA damaging agents | <i>ATM</i>       |       |  |  |   |   |   |   |  |  |
| miR-330 | NER                                                    | <i>GTF2H1-3P</i> | Mouse |  |  | ✓ | ✓ | ↑ | ↓ |  |  |
|         | BER                                                    | <i>TDG-3P</i>    |       |  |  |   |   |   |   |  |  |
|         | DSBR (NHEJ)                                            | <i>LIF4-3P</i>   |       |  |  |   |   |   |   |  |  |

- j) Expression profiles of miRNAs in gametes and embryos and their target genes involved in all repair pathways; mismatch repair, double strand break repair, nucleotide excision repair and base excision repair genes.

| miRNA   | DNA repair pathways           | Target repair mRNA                | Species | Oocyte | Sperm | Zygote | 2-cell | 4-cell | 8-cell | Morula | Blastocyst |
|---------|-------------------------------|-----------------------------------|---------|--------|-------|--------|--------|--------|--------|--------|------------|
| miR-136 | MMR                           | <i>MSH3</i>                       | Mouse   |        |       |        |        |        |        |        |            |
|         | DSBR (HR)                     | <i>RAD51L1</i>                    |         |        |       |        |        |        |        |        |            |
|         | DNA polymerases               | <i>POLH</i>                       |         |        |       |        |        |        |        |        |            |
| miR-210 | MMR                           | <i>MS2</i>                        | Mouse   | ✓      | ✓     |        | ↑      | ↑      | ↓      |        |            |
|         | DSBR (HR)                     | <i>RAD52</i>                      |         |        |       |        |        |        |        |        |            |
| miR-182 | MMR                           | <i>MSH4</i>                       | Mouse   | ✓      | ✓     | ✓      | ↓      | ↓      | ↑      |        |            |
|         | NER                           | <i>ERCC8 (CSA)</i>                | Bovine  | ✓      |       |        |        |        |        |        |            |
|         | DSBR                          | <i>BRCA1 [17], PARP1 [12, 17]</i> |         |        |       |        |        |        |        |        |            |
| miR-409 | NER                           | <i>ERCC4 (XPF) - 3p</i>           | Mouse   |        |       |        |        |        |        |        |            |
|         | MMR                           | <i>MSH6-3p</i>                    |         |        |       |        |        |        |        |        |            |
|         | Suspected DNA repair function | <i>DCLRE1B-3P</i>                 |         |        |       |        |        |        |        |        |            |
| miR-7   | MMR                           | <i>MSH3</i>                       | Mouse   |        |       |        | ✓      | ✓      | ↑      | ↓      |            |
|         | BER                           | <i>PARP1</i>                      |         |        |       |        |        |        |        |        |            |
| miR-31  | DSBR (NHEJ)                   | <i>XRCC5</i>                      | Mouse   |        |       |        | ✓      | ↓      | ↓      | ↓      |            |
|         | BER                           | <i>PARP1</i>                      |         |        |       |        |        |        |        |        |            |



k) Expression profiles of miRNAs in gametes and embryos and their target genes that are not involved in DNA repair.

| miRNA      | Expression of miRNAs in gametes and preimplantation embryo development |        |       |        |        |        |        |        |            |
|------------|------------------------------------------------------------------------|--------|-------|--------|--------|--------|--------|--------|------------|
|            | Species                                                                | Oocyte | Sperm | Zygote | 2-cell | 4-cell | 8-cell | Morula | Blastocyst |
| miR-7b     | Mouse                                                                  |        |       | ✓      | ✓      | ✓      | ✓      |        |            |
| miR-16-5p  | Mouse                                                                  |        |       | ✓      |        |        |        |        |            |
| miR-17     | Human                                                                  |        |       |        |        |        |        |        | ✓          |
| miR-30     | Human                                                                  | ✓      |       |        |        |        |        |        |            |
|            | Bovine                                                                 | ✓      |       |        |        |        |        |        |            |
| miR-122a   | Mouse                                                                  |        |       | ✓      | ↑      | ↑      | ↓      |        |            |
|            | Bovine                                                                 | ✓      |       |        |        |        |        |        |            |
| miR-126    | Bovine                                                                 | ✓      |       |        |        |        |        |        |            |
| miR-126-3p | Mouse                                                                  |        |       | ✓      | ↓      | ↑      | ↑      |        |            |
| miR-126-5p | Mouse                                                                  |        |       | ✓      | ↑      | ↑      | ↓      |        |            |
| miR-133a   | Mouse                                                                  | ✓      | ✓     | ✓      | ↑      | ↑      | ↑      |        |            |
| miR-133b   | Mouse                                                                  |        |       | ✓      | ✓      | ✓      | ↑      |        |            |
| miR-184    | Mouse                                                                  | ✓      | ✓     | ✓      | ↓      | ↓      | ↑      |        |            |
| miR-187    | Mouse                                                                  |        |       | ✓      | ↑      | ↑      | ↓      |        |            |
| miR-189    | Mouse                                                                  |        |       | ✓      | ✓      | ✓      | ✓      |        |            |
| miR-196a   | Mouse                                                                  |        |       | ✓      | ↓      | ↑      | ↑      |        |            |
| miR-196b   | Mouse                                                                  |        |       | ✓      | ✓      | ↑      | ↑      |        |            |
| miR-201    | Mouse                                                                  |        |       | ✓      | ✓      | ✓      | ✓      |        |            |
| miR-202    | Mouse                                                                  |        |       | ✓      | ↑      | ↓      | ↑      |        |            |
| miR-202-5p | Bovine                                                                 | ✓      |       |        |        |        |        |        |            |
| miR-205    | Mouse                                                                  |        |       | ✓      | ↓      | ↓      | ↑      |        |            |
|            | Bovine                                                                 | ✓      |       |        |        |        |        |        |            |
| miR-206c   | Mouse                                                                  | ✓      | ✓     | ✓      | ↓      | ↓      | ↑      |        |            |
|            | Bovine                                                                 | ✓      |       |        |        |        |        |        |            |
| miR-207    | Mouse                                                                  |        |       | ✓      | ↓      | ↑      | ↓      |        |            |
|            | Bovine                                                                 | ✓      |       |        |        |        |        |        |            |
| miR-213    | Mouse                                                                  |        |       | ✓      | ✓      | ✓      | ✓      |        |            |
| miR-214    | Mouse                                                                  | ✓      | ✓     | ✓      | ↓      | ↓      | ↓      |        |            |
|            | Bovine                                                                 | ✓      |       |        |        |        |        |        |            |

|            |        |   |   |   |   |   |   |   |   |
|------------|--------|---|---|---|---|---|---|---|---|
| miR-290    | Mouse  |   |   | ✓ | ↓ | ↑ | ↑ | ↑ | ↑ |
| miR-290-5p | Bovine | ✓ |   |   |   |   |   |   |   |
| miR-291-5p | Mouse  |   |   |   | ↑ | ↑ | ↑ |   |   |
| miR-292-3p | Mouse  |   |   | ✓ | ↓ | ↑ | ↑ |   |   |
|            | Bovine | ✓ |   |   |   |   |   |   |   |
| miR-292-5p | Mouse  |   |   | ✓ | ↑ | ↑ | ↑ | ↑ |   |
| miR-293    | Mouse  |   |   | ✓ | ↓ | ↑ | ↑ |   |   |
| miR-294    | Mouse  |   |   | ✓ | ↓ | ↑ | ↑ |   |   |
| miR-295    | Mouse  |   |   | ✓ | ↓ | ↑ | ↑ |   |   |
| miR-322-3p | Mouse  |   |   | ✓ | ↑ | ↓ | ↑ |   |   |
| miR-322-5p | Mouse  |   |   | ✓ | ↑ | ↑ | ↑ |   |   |
| miR-324-5p | Mouse  |   |   | ✓ | ↓ | ↑ | ↓ |   |   |
| miR-325    | Mouse  |   |   |   | ✓ | ✓ | ✓ |   |   |
| miR-326    | Mouse  |   |   | ✓ | ↓ | ↑ | ↑ |   |   |
| miR-329    | Mouse  | ✓ | ✓ | ✓ | ↑ | ↓ | ↑ |   |   |
|            | Bovine | ✓ |   |   |   |   |   |   |   |
| miR-339    | Mouse  |   |   | ✓ | ↓ | ↑ | ↑ |   |   |
|            | Bovine | ✓ |   |   |   |   |   |   |   |
| miR-339-5p | Human  | ✓ |   |   |   |   |   |   |   |
| miR-344    | Mouse  |   |   | ✓ | ✓ | ↑ | ↑ |   |   |
| miR-346    | Mouse  |   |   | ✓ | ↑ | ↓ | ↓ |   |   |
| miR-350    | Mouse  |   |   | ✓ | ↑ | ↑ | ↓ |   |   |
| miR-351    | Mouse  |   |   | ✓ | ↑ | ↑ | ↑ |   |   |
| miR-371-3p | Human  |   |   |   |   |   |   |   | ✓ |
| miR-374    | Human  |   |   |   |   |   |   |   | ✓ |
| miR-375    | Mouse  |   | ✓ | ✓ | ✓ | ✓ | ✓ |   |   |
|            | Bovine | ✓ |   |   |   |   |   |   |   |
| miR-411    | Mouse  |   |   | ✓ | ↓ | ↓ | ✓ |   |   |
|            | Bovine | ✓ |   |   |   |   |   |   |   |
| miR-455-3p | Bovine | ✓ |   |   |   |   |   |   |   |
| miR-467a   | Bovine | ✓ |   |   |   |   |   |   |   |
| miR-470    | Bovine | ✓ |   |   |   |   |   |   |   |
| miR-484    | Bovine | ✓ |   |   |   |   |   |   |   |

|             |        |   |  |  |  |  |  |  |   |
|-------------|--------|---|--|--|--|--|--|--|---|
|             | Human  |   |  |  |  |  |  |  | ✓ |
| miR-486-5p  | Human  | ✓ |  |  |  |  |  |  |   |
| miR-512-5p  | Bovine | ✓ |  |  |  |  |  |  |   |
| miR-517     | Human  |   |  |  |  |  |  |  | ✓ |
| miR-518b    | Bovine | ✓ |  |  |  |  |  |  |   |
| miR-541     | Bovine | ✓ |  |  |  |  |  |  |   |
| miR-542-5p  | Bovine | ✓ |  |  |  |  |  |  |   |
| miR-547     | Bovine | ✓ |  |  |  |  |  |  |   |
| miR-602     | Human  | ✓ |  |  |  |  |  |  |   |
| miR-638     | Bovine | ✓ |  |  |  |  |  |  |   |
| miR-662     | Human  | ✓ |  |  |  |  |  |  |   |
| miR-663     | Bovine | ✓ |  |  |  |  |  |  |   |
| miR-705     | Bovine | ✓ |  |  |  |  |  |  |   |
| miR-709     | Bovine | ✓ |  |  |  |  |  |  |   |
| miR-712     | Bovine | ✓ |  |  |  |  |  |  |   |
| miR-720     | Human  |   |  |  |  |  |  |  | ✓ |
| miR-721     | Bovine | ✓ |  |  |  |  |  |  | ✓ |
| miR-768     | Human  | ✓ |  |  |  |  |  |  |   |
| miR-762     | Bovine | ✓ |  |  |  |  |  |  | ✓ |
| miR-886-3p  | Human  |   |  |  |  |  |  |  | ✓ |
| miR-923     | Bovine | ✓ |  |  |  |  |  |  |   |
| miR-939     | Bovine | ✓ |  |  |  |  |  |  |   |
| miR-1228-3p | Bovine | ✓ |  |  |  |  |  |  |   |
| miR-1274    | Human  |   |  |  |  |  |  |  | ✓ |
|             | Bovine | ✓ |  |  |  |  |  |  |   |
| miR-1275    | Bovine | ✓ |  |  |  |  |  |  |   |
|             | Human  |   |  |  |  |  |  |  | ✓ |
| miR-1280    | Bovine | ✓ |  |  |  |  |  |  |   |
| miR-1308    | Bovine | ✓ |  |  |  |  |  |  |   |
| miR-1826    | Bovine | ✓ |  |  |  |  |  |  |   |

## References

1. Yang GH, Wang F, Yu J, Wang XS, Yuan JY, Zhang JW: **MicroRNAs are involved in erythroid differentiation control.** *J Cell Biochem* 2009, **107**(3):548-556.
2. Tang F, Kaneda M, O'Carroll D, Hajkova P, Barton SC, Sun YA, Lee C, Tarakhovsky A, Lao K, Surani MA: **Maternal microRNAs are essential for mouse zygotic development.** *Genes Dev* 2007, **21**(6):644-648.
3. Amanai M, Brahmajosyula M, Perry AC: **A restricted role for sperm-borne microRNAs in mammalian fertilization.** *Biol Reprod* 2006, **75**(6):877-884.
4. McCallie B, Schoolcraft WB, Katz-Jaffe MG: **Aberration of blastocyst microRNA expression is associated with human infertility.** *Fertil Steril* 2009, **93**(7):2374-2382.
5. Mondou E, Dufort I, Gohin M, Fournier E, Sirard MA: **Analysis of microRNAs and their precursors in bovine early embryonic development.** *Mol Hum Reprod* 2012, **18**(9):425-434.
6. Ro S, Park C, Sanders KM, McCarrey JR, Yan W: **Cloning and expression profiling of testis-expressed microRNAs.** *Dev Biol* 2007, **311**(2):592-602.
7. Xu YW, Wang B, Ding CH, Li T, Gu F, Zhou C: **Differentially expressed microRNAs in human oocytes.** *J Assist Reprod Genet* 2011, **28**(6):559-566.
8. Rosenbluth EM, Shelton DN, Sparks AE, Devor E, Christenson L, Van Voorhis BJ: **MicroRNA expression in the human blastocyst.** *Fertil Steril* 2012, **99**(3):855-861.
9. Xie QH, He XX, Chang Y, Sun SZ, Jiang X, Li PY, Lin JS: **MiR-192 inhibits nucleotide excision repair by targeting ERCC3 and ERCC4 in HepG2.2.15 cells.** *Biochem Biophys Res Commun* 2011, **410**(3):440-445.
10. Crosby ME, Kulshreshtha R, Ivan M, Glazer PM: **MicroRNA Regulation of DNA Repair Gene Expression in Hypoxic Stress.** *Cancer Research* 2009, **69**(3):1221-1229.
11. Adare A, Afanasiev S, Aidala C, Ajitanand NN, Akiba Y, Al-Bataineh H, Alexander J, Aoki K, Aramaki Y, Atomssa ET *et al*: **Elliptic and hexadecapole flow of charged hadrons in Au+Au collisions at  $\sqrt{s(NN)}=200$  GeV.** *Phys Rev Lett* 2010, **105**(6):062301.
12. Tanic M, Zajac M, Gomez-Lopez G, Benitez J, Martinez-Delgado B: **Integration of BRCA1-mediated miRNA and mRNA profiles reveals microRNA regulation of TRAF2 and NFkappaB pathway.** *Breast Cancer Res Treat* 2011.
13. Mueller AC, Sun D, Dutta A: **The miR-99 family regulates the DNA damage response through its target SNF2H.** *Oncogene* 2012.
14. Wang Y, Huang JW, Li M, Cavenee WK, Mitchell PS, Zhou X, Tewari M, Furnari FB, Taniguchi T: **MicroRNA-138 modulates DNA damage response by repressing histone H2AX expression.** *Mol Cancer Res* 2011, **9**(8):1100-1111.
15. Valeria N, Gasparinia P, Braconib C, Paonea A, Lovata F, Fabbria M, Sumania KM, Aldera H, Amadorie D, Patelb T *et al*: **MicroRNA-21 induces resistance to 5-fluorouracil by down-regulating human DNA MutS homolog 2 (hMSH2).** *PNAS* 2010, **107**:21098-21103.
16. McPhee F, Friborg J, Levine S, Chen C, Falk P, Yu F, Hernandez D, Lee M, Chaniewski S, Sheaffer AK *et al*: **Resistance Analysis of the Hepatitis C Virus NS3 Protease Inhibitor Asunaprevir.** *Antimicrob Agents Chemother* 2012.
17. Moskwa P, Buffa FM, Pan Y, Panchakshari R, Gottipati P, Muschel RJ, Beech J, Kulshreshtha R, Abdelmohsen K, Weinstock DM *et al*: **miR-182-Mediated Downregulation of BRCA1 Impacts DNA Repair and Sensitivity to PARP Inhibitors.** *Molecular cell* 2010, **41**(2):210-220.
